# Supplementary material
Source: PubMed Central journal article supplement (PMC8489883)
Supplement: mmc1.pdf [file mmc1.pdf]

# THE LANCET

## Supplementary appendix

This appendix formed part of the original submission. We post it as supplied by the authors.

Supplement to: De Foo C, Grépin KA, Cook AR, et al. Navigating from SARS-CoV-2 elimination to endemicity in Australia, Hong Kong, New Zealand, and Singapore. *Lancet* 2021; published online Oct 4. [http://dx.doi.org/10.1016/S0140-6736\(21\)02186-3](http://dx.doi.org/10.1016/S0140-6736(21)02186-3).

**Navigating from elimination to endemicity in Australia, Hong Kong, New Zealand, and Singapore** Appendix:

**Appendix: Snapshot of measures and strategies of four locations**

| <b>Location</b> | <b>Non-pharmaceutical interventions (NPIs)</b>                                                                                                                                                                                                                                                                                   | <b>Vaccination strategies</b>                                                                                                                                                                                                                 | <b>Lockdowns initiated in 2021</b>                                                                                                                                         | <b>Overall strategy</b>                                                                                                                                                                                                                      |
|-----------------|----------------------------------------------------------------------------------------------------------------------------------------------------------------------------------------------------------------------------------------------------------------------------------------------------------------------------------|-----------------------------------------------------------------------------------------------------------------------------------------------------------------------------------------------------------------------------------------------|----------------------------------------------------------------------------------------------------------------------------------------------------------------------------|----------------------------------------------------------------------------------------------------------------------------------------------------------------------------------------------------------------------------------------------|
| Singapore       | Maintain similar NPIs as the first year with certain measures enhanced such as home-based testing, vaccine-differentiated measures, home-recovery for stable and non-vulnerable groups, intensified community surveillance through wastewater testing and increased rostered routine testing schemes for higher risk industries. | Attempts to reach residual unvaccinated groups through outreach and financial incentives. Booster shots for immunocompromised and elderly to commence in mid-September. Potential future expansion of vaccination to children under 12 years. | Nationwide revert to Phase 2<br>Heightened Alert (PH2A), which has since been lifted.<br>Heightened Alert and Circuit Breaker measures will be used only as a last resort. | Four-stage transition roadmap comprising of<br>1) Preparatory Phase<br>2) Transition Stage A<br>3) Transition Stage B<br>4) COVID-resilient Nation                                                                                           |
| Australia       | Maintain similar NPIs as the first year but at varying degrees based on jurisdiction. Pilot programmes for differentiated measures using a domestic vaccine passport mobile application and home quarantine for returning vaccinated travellers are being tested.                                                                | Continue to accelerate its vaccination campaign, augmenting scheduled supply with additional mRNA vaccine swap deals with Poland (1 million doses), Singapore (500 000 doses) and the UK (4 million doses) to address immediate supply needs. | Targeted lockdowns in selected states and territories with outbreaks.                                                                                                      | Four-stage transition roadmap comprising of<br>1) Phase A: Vaccinate, Prepare and Pilot Stage<br>2) Phase B: Vaccination Transition Phase<br>3) Phase C: Vaccination Consolidation Phase<br>4) Phase D: Post-vaccination Phase               |
| New Zealand     | Maintain similar NPIs as the first year with differentiated tightness of NPIs based on jurisdiction's Alert Level and piloting programmes such as self-isolation trial for fully vaccinated returning Kiwis.                                                                                                                     | Continue to accelerate its vaccination campaign while purchasing additional vaccine doses from Denmark (500 000 doses) and Spain (250 000 doses). A mobile-based survey to monitor vaccine reactions has been implemented.                    | Targeted lockdowns at varying degrees in selected jurisdictions based on a four-level Alert System.                                                                        | Elimination strategy continues to be retained, with New Zealand aiming for a phased reopening in early 2022 as vaccination rates increase with a shift from what the government terms as "collective armour" from travel bans to "individual |

|           |                                                                                                                                                                                                                                                                                                                                                                                                                                                                        |                                                                                                                                                                                                                                                                                                                                                                                                                    |                                                                                                                            |                                                                                                               |
|-----------|------------------------------------------------------------------------------------------------------------------------------------------------------------------------------------------------------------------------------------------------------------------------------------------------------------------------------------------------------------------------------------------------------------------------------------------------------------------------|--------------------------------------------------------------------------------------------------------------------------------------------------------------------------------------------------------------------------------------------------------------------------------------------------------------------------------------------------------------------------------------------------------------------|----------------------------------------------------------------------------------------------------------------------------|---------------------------------------------------------------------------------------------------------------|
|           |                                                                                                                                                                                                                                                                                                                                                                                                                                                                        |                                                                                                                                                                                                                                                                                                                                                                                                                    |                                                                                                                            | armour” from vaccinations.                                                                                    |
| Hong Kong | Maintain similar NPIs as the first year with enhanced measures such as issuing compulsory testing notices that legally require residents to be tested after visiting or staying at certain premises with a positive case. Borders were also tightened as Hong Kong reimplemented its strict 21-day hotel quarantine for international travellers from high-risk countries and scrapped a 7-day exemption for fully vaccinated travellers with positive antibody tests. | Continue to accelerate its vaccination campaign through the introduction of walk-in visits and increased outreach services at malls and public housing estates. The government provides private providers with subsidies to vaccinate under the Vaccination Subsidy Scheme. Mandates for selected unvaccinated high-risk groups to undergo regular testing at their own expense to incentivise vaccination uptake. | “Restriction-testing declarations” in select buildings or other locations with confirmed cases (not considered a lockdown) | Elimination strategy continues to be pursued with the explicit goal of reopening borders with mainland China. |
